# Supplementary material for: Hedgehog pathway dysregulation contributes to the pathogenesis of human gastrointestinal stromal tumors via GLI-mediated activation of KIT expression
Source: PubMed Central journal article supplement (PMC5346634; doi:10.18632/oncotarget.12909), 2016-10-25
Supplement: oncotarget-07-78226-s002.pdf [file oncotarget-07-78226-s002.pdf]

# Hedgehog pathway dysregulation contributes to the pathogenesis of human gastrointestinal stromal tumors *via* GLI-mediated activation of *KIT* expression

## SUPPLEMENTARY TABLES S1-S8

### Authors:

Chih-Min Tang<sup>1\*</sup>, Tracy E. Lee<sup>1\*</sup>, Sabriya A. Syed<sup>2,3\*</sup>, Adam M. Burgoyne<sup>4</sup>, Stephanie Y. Leonard<sup>1</sup>, Fei Gao<sup>2</sup>, Jonathan C. Chan<sup>1</sup>, Eileen Shi<sup>5</sup>, Juliann Chmielecki<sup>6</sup>, Deborah Morosini<sup>6</sup>, Kai Wang<sup>6</sup>, Jeffrey S. Ross<sup>6</sup>, Michael L. Kendrick<sup>7</sup>, Michael R. Bardsley<sup>3</sup>, Martina De Siena<sup>1</sup>, Junhao Mao<sup>8</sup>, Olivier Harismendy<sup>9</sup>, Tamas Ordog<sup>2,10\*</sup>, Jason K. Sicklick<sup>1,5\*</sup>

### Affiliations:

<sup>1</sup> Division of Surgical Oncology, Department of Surgery, Moores UCSD Cancer Center, University of California, San Diego, La Jolla, California

<sup>2</sup> Enteric Neuroscience Program, Department of Physiology and Biomedical Engineering and Gastroenterology Research Unit, Division of Gastroenterology and Hepatology, Mayo Clinic, Rochester, Minnesota

<sup>3</sup> Department of Biochemistry and Molecular Biology, Mayo Clinic, Rochester, Minnesota

<sup>4</sup> Division of Hematology/Oncology, Department of Medicine, Moores UCSD Cancer Center, University of California, San Diego, La Jolla, California

<sup>5</sup> School of Medicine, University of California, San Diego, La Jolla, California

<sup>6</sup> Foundation Medicine, Inc., Cambridge, Massachusetts

<sup>7</sup> Department of Surgery, Mayo Clinic, Rochester, Minnesota

<sup>8</sup> Department of Molecular, Cell and Cancer Biology, University of Massachusetts, Worcester, Massachusetts

<sup>9</sup> Division of Biomedical Informatics, Moores UCSD Cancer Center, University of California San Diego, La Jolla, CA

<sup>10</sup> Center for Individualized Medicine, Mayo Clinic, Rochester, Minnesota

\*These authors contributed equally to this work.

### Corresponding Authors:

Jason K. Sicklick, MD, Division of Surgical Oncology, Moores UCSD Cancer Center, University of California, San Diego, 3855 Health Sciences Drive, MC 0987, La Jolla, CA 92093-0987; Tel: 858-822-6173; Fax: 858-228-5153; Email: [jsicklick@ucsd.edu](mailto:jsicklick@ucsd.edu)

Tamas Ordog, MD, Guggenheim 10, Mayo Clinic, 200 1st Street SW, Rochester, MN 55905; Tel: 507-538-3906; Fax: 507-255-6318; E-mail: [ordog.tamas@mayo.edu](mailto:ordog.tamas@mayo.edu)

**Supplementary Table S1. Representation of the “Development\_Hedgehog Signaling” network (MetaCore™) in FACS-purified human gastric ICC, mouse small intestinal ICC and mouse gastric ICC-SC.**

| Cells <sup>a</sup> | Species             | Rank <sup>b</sup> | P <sup>c</sup> | FDR <sup>c</sup> | Ratio <sup>d</sup> |                  |
|--------------------|---------------------|-------------------|----------------|------------------|--------------------|------------------|
|                    |                     |                   |                |                  | Genes in set       | Genes in network |
| gastric ICC        | <i>Homo sapiens</i> | 29                | 1.046E-02      | 0.0566           | 139                | 254              |
| ICC-MY             | <i>Mus musculus</i> | 14                | 1.009E-03      | 0.0113           | 34                 | 254              |
| ICC-DMP            | <i>Mus musculus</i> | 9                 | 3.192E-06      | 0.0000560        | 46                 | 254              |
| 2xSCS2F10          | <i>Mus musculus</i> | 47                | 7.910E-05      | 0.000265         | 105                | 254              |

<sup>a</sup>, FACS-purified and cultured cells analyzed by Affymetrix Human Genome U133 Plus 2.0 and Mouse Genome 430 2.0 microarrays: human gastric ICC purified by FACS (n=6) and compared to dissociated, unfractionated gastric *tunica muscularis* source tissue samples (n=4) (see details in main text); FACS-purified ICC-MY, mouse small intestinal ICC associated with the myenteric plexus (n=3) and ICC-DMP, mouse small intestinal ICC associated with the deep muscular plexus (n=3) compared to unfractionated BALB/c small intestinal *tunica muscularis* tissues (n=2) [1]; 2xSCS2F10, mouse gastric ICC-SC line (n=3) compared to unfractionated C57BL/6J gastric *tunica muscularis* tissues (n=2) [2]. <sup>b</sup>, Ranking of the “Development\_Hedgehog Signaling” network among biological process networks detected by MetaCore™ analysis of gene sets with significantly higher expression than controls (log<sub>2</sub> fold change >1, Benjamini-Hochberg Q<0.05). See top 50 process networks for each cell type in **Supplementary Table S8**. <sup>c</sup>, P values and false discovery rates (FDR) from the network analysis. <sup>d</sup>, Ratio of differentially expressed genes and genes in the “Development\_Hedgehog Signaling” network.

**Supplementary Table S2. Sources of human GIST microarray data.**

| NCBI GEO <sup>a</sup> Series:<br>GSE17743 [3] <sup>b</sup> |           | NCBI GEO Series:<br>GSE8167 [4] |           | NCBI GEO Series:<br>GSE20708 [5] |           |
|------------------------------------------------------------|-----------|---------------------------------|-----------|----------------------------------|-----------|
| Label <sup>c</sup>                                         | Sample ID | Label                           | Sample ID | Label                            | Sample ID |
| GIST_KIT_Ex11_1                                            | GSM442936 | GIST_WT_8                       | GSM202198 | GIST_KIT_Ex11_15                 | GSM519700 |
| GIST_KIT_Ex11_2                                            | GSM442937 | GIST_WT_9                       | GSM202199 | GIST_KIT_Ex9_2                   | GSM519701 |
| GIST_KIT_Ex11_3                                            | GSM442938 | GIST_KIT_Ex11_22                | GSM202200 | GIST_PDGFRA_Ex12_3               | GSM519702 |
| GIST_PDGFRA_Ex18_1                                         | GSM442939 | GIST_KIT_Ex11_23                | GSM202204 | GIST_WT_4                        | GSM519703 |
| GIST_KIT_Ex11_4                                            | GSM442940 | GIST_KIT_Ex11_24                | GSM202205 | GIST_KIT_Ex11_16                 | GSM519704 |
| GIST_KIT_Ex11_5                                            | GSM442941 | GIST_KIT_Ex11_25                | GSM202206 | GIST_KIT_Ex11_17                 | GSM519705 |
| GIST_KIT_Ex9_1                                             | GSM442942 | GIST_WT_10                      | GSM202207 | GIST_WT_5                        | GSM519706 |
| GIST_WT_1                                                  | GSM442943 | GIST_KIT_Ex11_26                | GSM202208 | GIST_KIT_Ex11_18                 | GSM519707 |
| GIST_WT_2                                                  | GSM442944 | GIST_WT_11                      | GSM202209 | GIST_PDGFRA_Ex14_1               | GSM519708 |
| GIST_KIT_Ex11_6                                            | GSM442945 | GIST_KIT_Ex11_27                | GSM202210 | GIST_KIT_Ex11_19                 | GSM519710 |
| GIST_KIT_Ex11_7                                            | GSM442946 | GIST_KIT_Ex11_28                | GSM202211 | GIST_PDGFRA_Ex18_10              | GSM519711 |
| GIST_PDGFRA_Ex18_2                                         | GSM442947 | GIST_KIT_Ex11_29                | GSM202212 | GIST_KIT_Ex11_20                 | GSM519712 |
| GIST_PDGFRA_Ex12_1                                         | GSM442948 | GIST_KIT_Ex11_30                | GSM202213 | GIST_WT_6                        | GSM519715 |
| GIST_PDGFRA_Ex18_3                                         | GSM442949 | GIST_KIT_Ex11_31                | GSM202216 | GIST_PDGFRA_Ex18_11              | GSM519716 |
| GIST_PDGFRA_Ex18_4                                         | GSM442950 | GIST_KIT_Ex11_32                | GSM202217 | GIST_KIT_Ex11_21                 | GSM519717 |
| GIST_WT_3                                                  | GSM442951 | GIST_KIT_Ex11_33                | GSM202218 | GIST_WT_7                        | GSM519718 |
| GIST_PDGFRA_Ex18_5                                         | GSM442952 | GIST_KIT_Ex11_34                | GSM202220 | GIST_PDGFRA_Ex12_4               | GSM519720 |
| GIST_PDGFRA_Ex12_2                                         | GSM442953 | GIST_KIT_Ex11_35                | GSM202221 |                                  |           |
| GIST_KIT_Ex11_8                                            | GSM442954 | GIST_WT_12                      | GSM202223 |                                  |           |
| GIST_PDGFRA_Ex18_6                                         | GSM442955 | GIST_WT_13                      | GSM202225 |                                  |           |
| GIST_PDGFRA_Ex18_7                                         | GSM442956 | GIST_KIT_Ex11_36                | GSM202226 |                                  |           |
| GIST_KIT_Ex11_9                                            | GSM442957 | GIST_WT_14                      | GSM202227 |                                  |           |
| GIST_KIT_Ex11_10                                           | GSM442958 | GIST_KIT_Ex11_37                | GSM202228 |                                  |           |
| GIST_KIT_Ex11_11                                           | GSM442959 |                                 |           |                                  |           |
| GIST_KIT_Ex11_12                                           | GSM442960 |                                 |           |                                  |           |
| GIST_PDGFRA_Ex18_8                                         | GSM442961 |                                 |           |                                  |           |
| GIST_KIT_Ex11_13                                           | GSM442962 |                                 |           |                                  |           |
| GIST_PDGFRA_Ex18_9                                         | GSM442963 |                                 |           |                                  |           |
| GIST_KIT_Ex11_14                                           | GSM442964 |                                 |           |                                  |           |

<sup>a</sup>, NCBI GEO, National Center for Biotechnology Information Gene Expression Omnibus.

<sup>b</sup>, **References:**

1. Chen H, Ordog T, Chen J, Young DL, Bardsley MR, Redelman D, Ward SM, Sanders KM. Differential gene expression in functional classes of interstitial cells of Cajal in murine small intestine. *Physiol Genomics*. 2007; 31: 492-509. doi: 10.1152/physiolgenomics.001113.2007.
2. Dave M, Hayashi Y, Gajdos GB, Smyrk TC, Svingen PA, Kvasha SM, Lorincz A, Dong H, Faubion WA, Jr., Ordog T. Stem cells for murine interstitial cells of cajal suppress cellular immunity and colitis via prostaglandin E2 secretion. *Gastroenterology*. 2015; 148: 978-90. doi: 10.1053/j.gastro.2015.01.036.
3. Ostrowski J, Polkowski M, Paziewska A, Skrzypczak M, Goryca K, Rubel T, Kokoszynska K, Rutkowski P, Nowecki ZI, Vel Dobosz AJ, Jarosz D, Ruka W, Wyrwicz LS. Functional features of gene expression profiles differentiating gastrointestinal stromal tumours according to KIT mutations and expression. *BMC Cancer*. 2009; 9: 413. doi: 10.1186/1471-2407-9-413.
4. Yamaguchi U, Nakayama R, Honda K, Ichikawa H, Hasegawa T, Shitashige M, Ono M, Shoji A, Sakuma T, Kuwabara H, Shimada Y, Sasako M, Shimoda T, et al. Distinct gene expression-defined classes of gastrointestinal stromal tumor. *J Clin Oncol*. 2008; 26: 4100-8. doi: 10.1200/JCO.2007.14.2331.
5. Astolfi A, Nannini M, Pantaleo MA, Di Battista M, Heinrich MC, Santini D, Catena F, Corless CL, Maleddu A, Saponara M, Lolli C, Di Scioscio V, Formica S, et al. A molecular portrait of gastrointestinal stromal tumors: an integrative analysis of gene expression profiling and high-resolution genomic copy number. *Lab Invest*. 2010; 90: 1285-94. doi: 10.1038/labinvest.2010.110.

<sup>c</sup>, Labels used in **Figure 3A**. Mutated gene, exon number and serial number are indicated.

**Supplementary Table S3. Antibodies and other reagents used for the isolation of ICC, *NOT* ICC and hematopoietic cells from human gastric *tunica muscularis*.**

| Target                  | Supplier      | Host/Source           | Clone/ID                                | Isotype                      | Label               | Final conc. or amount/10 <sup>6</sup> cells/100 $\mu$ L |
|-------------------------|---------------|-----------------------|-----------------------------------------|------------------------------|---------------------|---------------------------------------------------------|
| KIT <sup>a</sup>        | BioLegend     | Mouse mc <sup>b</sup> | 104D2                                   | IgG <sub>1</sub> , $\kappa$  | APC <sup>c</sup>    | 0.5 $\mu$ g                                             |
| CD34 <sup>d</sup>       | BD Pharmingen | Mouse mc              | 581                                     | IgG <sub>1</sub> , $\kappa$  | PE <sup>e</sup>     | 0.0625 $\mu$ g                                          |
| FCER1A <sup>f</sup>     | BioLegend     | Mouse mc              | AER-37                                  | IgG <sub>2b</sub> , $\kappa$ | PE-Cy7 <sup>g</sup> | 0.25 $\mu$ g                                            |
| CD11B <sup>h</sup>      | BD Pharmingen | Mouse mc              | ICRF44                                  | IgG <sub>1</sub> , $\kappa$  | PE-Cy7              | 0.25 $\mu$ g                                            |
| CD45 <sup>i</sup>       | BD Pharmingen | Mouse mc              | HI30                                    | IgG <sub>1</sub> , $\kappa$  | PE-Cy7              | 0.1 $\mu$ g                                             |
| Dead cells <sup>j</sup> | eBioscience   |                       | Fixable Viability Dye                   |                              | APC-eFluor 780      | 1 $\mu$ L/mL                                            |
| Fcy receptors           | BD Pharmingen |                       | Purified NA/LE<br>Human BD Fc<br>Block™ |                              |                     | 20 $\mu$ L                                              |

<sup>a</sup>, v-kit Hardy-Zuckerman 4 feline sarcoma viral oncogene homolog (CD117); <sup>b</sup>, mc, monoclonal; <sup>c</sup>, APC, allophycocyanin; <sup>d</sup>, CD34 molecule; <sup>e</sup>, PE, phycoerythrin; <sup>f</sup>, FCER1A, Fc fragment of IgE, high affinity I, receptor for; alpha polypeptide; <sup>g</sup>, Cy7, cyanine 7; <sup>h</sup>, CD11B, integrin, alpha M (complement component 3 receptor 3 subunit) (ITGAM, MAC-1); <sup>i</sup>, CD45, protein tyrosine phosphatase, receptor type, C (PTPRC), alias: leukocyte common antigen; <sup>j</sup>, Fixable Viability Dye. Suppliers: BioLegend, Inc., San Diego, CA; BD Pharmingen, Becton, Dickinson and Company, Franklin Lakes, NJ; eBioscience, Inc., San Diego, CA.

**Supplementary Table S4. Configuration of the Becton Dickinson LSR II flow cytometer.**

| <b>Laser</b>                    | <b>Excitation wavelength (nm)</b> | <b>Dichroic filter (nm)</b> | <b>Emission filter (nm; peak/bandwidth)</b> | <b>Detector type</b> | <b>Light scatter or fluorochrome used</b> |
|---------------------------------|-----------------------------------|-----------------------------|---------------------------------------------|----------------------|-------------------------------------------|
| Coherent®<br>Sapphire™<br>20 mW | 488                               |                             |                                             | Photodiode           | Forward scatter                           |
|                                 |                                   |                             | 488/10                                      | PMT <sup>a</sup>     | Side scatter                              |
|                                 |                                   | 505 LP <sup>b</sup>         | 530/30                                      | PMT                  | Unused                                    |
|                                 |                                   | 550 LP                      | 575/26                                      | PMT                  | PE <sup>c</sup>                           |
|                                 |                                   | 595 LP                      | 610/20                                      | PMT                  | Unused                                    |
|                                 |                                   | 685 LP                      | 695/40                                      | PMT                  | Unused                                    |
|                                 |                                   | 735 LP                      | 780/60                                      | PMT                  | PE-Cy7 <sup>d</sup>                       |
| Coherent®<br>CUBE<br>100 mW     | 407                               |                             | 450/50                                      | PMT                  | Unused                                    |
|                                 |                                   | 505LP                       | 525/50                                      | PMT                  | Unused                                    |
|                                 |                                   | 535 LP                      | 590/40                                      | PMT                  | Unused                                    |
|                                 |                                   | 595 LP                      | 610/20                                      | PMT                  | Unused                                    |
|                                 |                                   | 630 LP                      | 670/30                                      | PMT                  | Unused                                    |
|                                 |                                   | 670 LP                      | 710/50                                      | PMT                  | Unused                                    |
| Coherent®<br>CUBE<br>40 mW      | 640                               |                             | 660/20                                      | PMT                  | APC <sup>e</sup>                          |
|                                 |                                   | 685 LP                      | 712/20                                      | PMT                  | Unused                                    |
|                                 |                                   | 735 LP                      | 780/60                                      | PMT                  | APC-eFluor 780                            |

<sup>a</sup>, PMT, photomultiplier tube; <sup>b</sup>, LP, long-pass; <sup>c</sup>, PE, phycoerythrin; <sup>d</sup>, Cy7, cyanine 7; <sup>e</sup>, APC, allophycocyanin.

**Supplementary Table S5. Patient, tissue and harvested cell information.**

| Age (yr)        | Sex | Surgery            | Sample   | ICC count <sup>a</sup> | NOT ICC count <sup>b</sup> | HP <sup>+</sup> count <sup>c</sup> |
|-----------------|-----|--------------------|----------|------------------------|----------------------------|------------------------------------|
| 33              | M   | Duodenal switch    | ICC_1    | 1,009                  |                            |                                    |
| 32 <sup>d</sup> | F   | Sleeve gastrectomy | ICC_2    | 5,528                  |                            |                                    |
| 23 <sup>d</sup> | F   | Sleeve gastrectomy |          |                        |                            |                                    |
| 60              | F   | Sleeve gastrectomy | ICC_3    | 4,929                  |                            |                                    |
| 51              | F   | Sleeve gastrectomy | ICC_4    | 10,448                 |                            |                                    |
| 52              | M   | Sleeve gastrectomy | ICC_5    | 4,584                  |                            |                                    |
| 51              | F   | Sleeve gastrectomy | NOT_ICC  |                        | 428,676                    |                                    |
| 31              | F   | Sleeve gastrectomy | TISSUE_1 |                        |                            |                                    |
| 51              | M   | Sleeve gastrectomy | TISSUE_2 |                        |                            |                                    |
| 51              | F   | Sleeve gastrectomy | TISSUE_3 |                        |                            |                                    |
| 23              | F   | Sleeve gastrectomy | TISSUE_4 |                        |                            |                                    |
| 57              | F   | Sleeve gastrectomy | HP_1     |                        |                            | 127,186                            |
| 47              | F   | Sleeve gastrectomy | ICC_6    | 2,541                  |                            |                                    |
|                 |     |                    | HP_2     |                        |                            | 397,368                            |
| 27              | M   | Sleeve gastrectomy | HP_3     |                        |                            | 552,154                            |

<sup>a</sup>, ICC, interstitial cells of Cajal: KIT<sup>+</sup>CD34<sup>-</sup> cells excluding the Fixable Viability Dye allophycocyanin (APC)-eFluor 780 (live cells) and not labeled with antibodies against the hematopoietic markers CD45, FCER1A, and anti-CD11B (HP<sup>-</sup>); <sup>b</sup>, NOT ICC: live, HP<sup>-</sup>KIT<sup>-</sup>CD34<sup>-</sup> cells; <sup>c</sup>, HP<sup>+</sup>: live HP<sup>+</sup> cells. <sup>d</sup>, Samples combined for processing due to small size.

**Supplementary Table S6.** RT-PCR primers for human samples.

| Gene                   | Direction | Sequence                 | Amplicon size (bp) |
|------------------------|-----------|--------------------------|--------------------|
| <i>SHH</i>             | Forward   | GCTCGGTGAAAGCAGAGAAC     | 109                |
|                        | Reverse   | CTCAGGTCCTTCACCAGCTT     |                    |
| <i>IHH</i>             | Forward   | TCCGTCAAGTCCGAGCAC       | 109                |
|                        | Reverse   | GCCTCACGGCTGACAAGG       |                    |
| <i>PTCH1</i>           | Forward   | CCACCAGACGCTGTTTAGTCA    | 72                 |
|                        | Reverse   | CGATGGAGTCCTTGCCTACAA    |                    |
| <i>SMO</i>             | Forward   | CAGTTCCAAACATGGCAAACAG   | 200                |
|                        | Reverse   | TGCTATGTCAGGCCAATGTGA    |                    |
| <i>GLI1</i>            | Forward   | TGCAGTAAAGCCTTCAGCAATG   | 132                |
|                        | Reverse   | TTTTCGCAGCGAGCTAGGAT     |                    |
| <i>GLI2</i>            | Forward   | CGAGAAACCCTACATCTGCAAGA  | 88                 |
|                        | Reverse   | GTGGACCGTTTTACATGCTT     |                    |
| <i>GLI3</i>            | Forward   | AAACCCCAATCATGGACTCAAC   | 98                 |
|                        | Reverse   | TACGTGCTCCATCCATTTGGT    |                    |
| <i>KIT</i>             | Forward   | TGTCATCAGCCACCATCCTA     | 156                |
|                        | Reverse   | GCAGAATTGGAGAAGCCTTG     |                    |
| <i>KIT<sup>a</sup></i> | Forward   | GGGATTTTCTCTGCGTTCTG     | 99                 |
|                        | Reverse   | GATGGATGGATGGTGGAGAC     |                    |
| <i>ANO1</i>            | Forward   | TGTCAGAGCCAAAGACATCG     | 183                |
|                        | Reverse   | AAGGAGGAGAGGGTGTGGTT     |                    |
| <i>ACTB</i>            | Forward   | AATGTGGCCGAGGACTTTGATTGC | 93                 |
|                        | Reverse   | AGGATGGCAAGGGACTTCCTGTAA |                    |

<sup>a</sup>, Used for microarray validation.



**Supplementary Table S7.** RT-PCR primers for mouse samples.

| <b>Gene</b>  | <b>Direction</b> | <b>Sequence</b>          | <b>Amplicon size (bp)</b> |
|--------------|------------------|--------------------------|---------------------------|
| <i>Shh</i>   | Forward          | CTGGCCAGATGTTTTCTGGT     | 117                       |
|              | Reverse          | TAAAGGGGTCAGCTTTTTGG     |                           |
| <i>Ihh</i>   | Forward          | CCGAACCTTCATCTTGGTG      | 124                       |
|              | Reverse          | ACAGATGGAATGCGTGTGAA     |                           |
| <i>Ptch1</i> | Forward          | ATGCTCCTTTCCTCCTGAAACC   | 168                       |
|              | Reverse          | TGAACTGGGCAGCTATGAAGTC   |                           |
| <i>Smo</i>   | Forward          | GCCTGGTGCTTATTGTGG       | 75                        |
|              | Reverse          | GGTGGTTGCTCTTGATGG       |                           |
| <i>Gli1</i>  | Forward          | AACTCCACAGGCACACAGG      | 79                        |
|              | Reverse          | GCTCAGGCTTCTCCTCTCTC     |                           |
| <i>Gli2</i>  | Forward          | CCATTCATAAGCGGAGCAAG     | 105                       |
|              | Reverse          | CCAGGTCTTCCTTGAGATCG     |                           |
| <i>Gli3</i>  | Forward          | GCTCTTCAGCAAGTGGTTCC     | 122                       |
|              | Reverse          | CTGTCCGGCTTAGGATCTGTTG   |                           |
| <i>Kit</i>   | Forward          | GGCTAGCCAGAGACATCAGG     | 159                       |
|              | Reverse          | AGGAGAAGAGCTCCCAGAGG     |                           |
| <i>Actb</i>  | Forward          | GCTCTGGCTCCTAGCACC       | 74                        |
|              | Reverse          | CCACCGATCCACACAGAGTACTTG |                           |

**Supplementary Table S8.** Top 50 process networks for each cell type (in attached MS Excel file).
